# Supplementary material for: Molecular scaffolds with remote directing groups for selective palladium-catalyzed C–H bond functionalizations
Source: Royal Society of Chemistry journal article supplement (doi:10.1039/c2sc20176c), 2012-01-01

**Supporting Information: X-ray Crystallographic Tables**

**Molecular Scaffolds with Remote Directing Groups for Selective Palladium-Catalyzed C-H  
Bond Functionalizations**

Erin E. Stache, Curtis A. Seizert, and Eric M. Ferreira\*

*Department of Chemistry, Colorado State University, Fort Collins, CO 80523*

[emferr@mail.colostate.edu](mailto:emferr@mail.colostate.edu)

Table 1. Crystal data and structure refinement for **32**.

|                                   |                                                              |                     |
|-----------------------------------|--------------------------------------------------------------|---------------------|
| Identification code               | ef02                                                         |                     |
| Empirical formula                 | $C_{26}H_{25}N_3O_{3.35}Pd$                                  |                     |
| Formula weight                    | 539.88                                                       |                     |
| Temperature                       | 296(2) K                                                     |                     |
| Wavelength                        | 0.71073 Å                                                    |                     |
| Crystal system                    | Orthorhombic                                                 |                     |
| Space group                       | $P 2_1 2_1 2_1$                                              |                     |
| Unit cell dimensions              | $a = 10.6627(4)$ Å                                           | $\alpha = 90^\circ$ |
|                                   | $b = 13.0584(5)$ Å                                           | $\beta = 90^\circ$  |
|                                   | $c = 17.7049(6)$ Å                                           | $\gamma = 90^\circ$ |
| Volume                            | 2465.19(16) Å <sup>3</sup>                                   |                     |
| Z                                 | 4                                                            |                     |
| Density (calculated)              | 1.455 Mg/m <sup>3</sup>                                      |                     |
| Absorption coefficient            | 0.786 mm <sup>-1</sup>                                       |                     |
| F(000)                            | 1099.2                                                       |                     |
| Crystal size                      | 0.20 x 0.20 x 0.20 mm <sup>3</sup>                           |                     |
| Theta range for data collection   | 2.47 to 36.54°.                                              |                     |
| Index ranges                      | $-17 \leq h \leq 17, -21 \leq k \leq 21, -28 \leq l \leq 29$ |                     |
| Reflections collected             | 86426                                                        |                     |
| Independent reflections           | 12049 [R(int) = 0.0365]                                      |                     |
| Completeness to theta = 36.54°    | 99.5 %                                                       |                     |
| Absorption correction             | Semi-empirical from equivalents                              |                     |
| Max. and min. transmission        | 0.8587 and 0.8587                                            |                     |
| Refinement method                 | Full-matrix least-squares on F <sup>2</sup>                  |                     |
| Data / restraints / parameters    | 12049 / 0 / 308                                              |                     |
| Goodness-of-fit on F <sup>2</sup> | 1.053                                                        |                     |
| Final R indices [I > 2sigma(I)]   | R1 = 0.0231, wR2 = 0.0490                                    |                     |
| R indices (all data)              | R1 = 0.0263, wR2 = 0.0504                                    |                     |
| Absolute structure parameter      | -0.005(11)                                                   |                     |
| Largest diff. peak and hole       | 0.673 and -0.544 e.Å <sup>-3</sup>                           |                     |

Table 2. Atomic coordinates ( $\times 10^4$ ) and equivalent isotropic displacement parameters ( $\text{\AA}^2 \times 10^3$ ) for ef02.  $U(\text{eq})$  is defined as one third of the trace of the orthogonalized  $U^{ij}$  tensor.

|       | x        | y        | z        | $U(\text{eq})$ |
|-------|----------|----------|----------|----------------|
| Pd(1) | 8809(1)  | 7697(1)  | 8655(1)  | 13(1)          |
| N(2)  | 10193(1) | 8776(1)  | 8827(1)  | 14(1)          |
| C(19) | 8768(1)  | 9649(1)  | 7933(1)  | 16(1)          |
| N(1)  | 9696(1)  | 6715(1)  | 9459(1)  | 16(1)          |
| C(7)  | 10502(1) | 8975(1)  | 9655(1)  | 14(1)          |
| C(6)  | 9833(1)  | 8259(1)  | 10214(1) | 16(1)          |
| N(3)  | 9528(1)  | 10427(1) | 9148(1)  | 17(1)          |
| C(8)  | 11942(1) | 8930(1)  | 9718(1)  | 19(1)          |
| C(12) | 10021(1) | 10055(1) | 9797(1)  | 17(1)          |
| C(11) | 9824(1)  | 9801(1)  | 8483(1)  | 15(1)          |
| C(24) | 8151(1)  | 8700(1)  | 7930(1)  | 16(1)          |
| C(10) | 11408(1) | 8433(1)  | 8474(1)  | 18(1)          |
| C(5)  | 10117(1) | 7139(1)  | 10107(1) | 15(1)          |
| C(9)  | 12413(1) | 9017(1)  | 8907(1)  | 21(1)          |
| C(18) | 9730(1)  | 12165(1) | 8638(1)  | 23(1)          |
| C(13) | 9097(1)  | 11465(1) | 9087(1)  | 19(1)          |
| C(4)  | 10752(1) | 6569(1)  | 10647(1) | 19(1)          |
| C(17) | 9277(2)  | 13161(1) | 8584(1)  | 29(1)          |
| C(1)  | 9895(1)  | 5711(1)  | 9341(1)  | 21(1)          |
| C(20) | 8464(1)  | 10406(1) | 7404(1)  | 22(1)          |
| C(3)  | 10947(1) | 5531(1)  | 10522(1) | 26(1)          |
| C(22) | 6894(1)  | 9292(1)  | 6875(1)  | 25(1)          |
| C(21) | 7516(1)  | 10227(1) | 6881(1)  | 26(1)          |
| C(23) | 7211(1)  | 8536(1)  | 7394(1)  | 21(1)          |
| C(14) | 8044(2)  | 11753(1) | 9492(1)  | 32(1)          |
| C(2)  | 10502(1) | 5095(1)  | 9861(1)  | 27(1)          |
| C(15) | 7588(2)  | 12748(1) | 9423(1)  | 41(1)          |
| C(16) | 8202(2)  | 13446(1) | 8967(1)  | 35(1)          |
| O(1)  | 10070(1) | 10488(1) | 10405(1) | 24(1)          |
| O(2)  | 7325(1)  | 6732(1)  | 8492(1)  | 17(1)          |
| C(25) | 7422(1)  | 6005(1)  | 8005(1)  | 19(1)          |

|        |         |         |         |       |
|--------|---------|---------|---------|-------|
| O(3)   | 8397(1) | 5773(1) | 7674(1) | 33(1) |
| C(26)  | 6219(2) | 5420(1) | 7864(1) | 29(1) |
| O(101) | 5211(5) | 6845(5) | 6183(3) | 29(2) |
| O(102) | 4106(5) | 7501(4) | 7609(3) | 18(2) |

---

Table 3. Bond lengths [Å] and angles [°] for ef02.

---

|             |            |
|-------------|------------|
| Pd(1)-C(24) | 1.9637(12) |
| Pd(1)-O(2)  | 2.0437(9)  |
| Pd(1)-N(2)  | 2.0627(10) |
| Pd(1)-N(1)  | 2.1368(10) |
| N(2)-C(10)  | 1.5069(15) |
| N(2)-C(11)  | 1.5227(16) |
| N(2)-C(7)   | 1.5234(15) |
| C(19)-C(20) | 1.3999(17) |
| C(19)-C(24) | 1.4032(18) |
| C(19)-C(11) | 1.5016(17) |
| N(1)-C(1)   | 1.3443(17) |
| N(1)-C(5)   | 1.3495(15) |
| C(7)-C(12)  | 1.5216(18) |
| C(7)-C(6)   | 1.5376(17) |
| C(7)-C(8)   | 1.5407(16) |
| C(6)-C(5)   | 1.5045(16) |
| N(3)-C(12)  | 1.3545(16) |
| N(3)-C(13)  | 1.4346(16) |
| N(3)-C(11)  | 1.4674(15) |
| C(8)-C(9)   | 1.5247(18) |
| C(12)-O(1)  | 1.2172(15) |
| C(24)-C(23) | 1.3977(17) |
| C(10)-C(9)  | 1.5229(18) |
| C(5)-C(4)   | 1.3883(17) |
| C(18)-C(13) | 1.3872(18) |
| C(18)-C(17) | 1.3915(19) |
| C(13)-C(14) | 1.384(2)   |
| C(4)-C(3)   | 1.389(2)   |
| C(17)-C(16) | 1.383(2)   |
| C(1)-C(2)   | 1.3834(19) |
| C(20)-C(21) | 1.391(2)   |
| C(3)-C(2)   | 1.384(2)   |
| C(22)-C(21) | 1.389(2)   |
| C(22)-C(23) | 1.390(2)   |

|                   |            |
|-------------------|------------|
| C(14)-C(15)       | 1.393(2)   |
| C(15)-C(16)       | 1.382(3)   |
| O(2)-C(25)        | 1.2862(15) |
| C(25)-O(3)        | 1.2307(16) |
| C(25)-C(26)       | 1.514(2)   |
|                   |            |
| C(24)-Pd(1)-O(2)  | 92.38(4)   |
| C(24)-Pd(1)-N(2)  | 84.06(5)   |
| O(2)-Pd(1)-N(2)   | 174.85(4)  |
| C(24)-Pd(1)-N(1)  | 173.75(5)  |
| O(2)-Pd(1)-N(1)   | 93.87(4)   |
| N(2)-Pd(1)-N(1)   | 89.71(4)   |
| C(10)-N(2)-C(11)  | 108.49(9)  |
| C(10)-N(2)-C(7)   | 105.30(9)  |
| C(11)-N(2)-C(7)   | 106.93(9)  |
| C(10)-N(2)-Pd(1)  | 110.49(7)  |
| C(11)-N(2)-Pd(1)  | 110.88(7)  |
| C(7)-N(2)-Pd(1)   | 114.43(7)  |
| C(20)-C(19)-C(24) | 120.86(12) |
| C(20)-C(19)-C(11) | 120.96(11) |
| C(24)-C(19)-C(11) | 118.04(10) |
| C(1)-N(1)-C(5)    | 118.73(11) |
| C(1)-N(1)-Pd(1)   | 123.44(9)  |
| C(5)-N(1)-Pd(1)   | 117.78(8)  |
| C(12)-C(7)-N(2)   | 104.14(10) |
| C(12)-C(7)-C(6)   | 107.50(10) |
| N(2)-C(7)-C(6)    | 114.51(10) |
| C(12)-C(7)-C(8)   | 111.04(11) |
| N(2)-C(7)-C(8)    | 106.24(10) |
| C(6)-C(7)-C(8)    | 113.10(11) |
| C(5)-C(6)-C(7)    | 114.60(10) |
| C(12)-N(3)-C(13)  | 121.81(11) |
| C(12)-N(3)-C(11)  | 113.41(10) |
| C(13)-N(3)-C(11)  | 122.34(10) |
| C(9)-C(8)-C(7)    | 104.85(10) |
| O(1)-C(12)-N(3)   | 126.92(12) |

|                   |            |
|-------------------|------------|
| O(1)-C(12)-C(7)   | 124.23(11) |
| N(3)-C(12)-C(7)   | 108.85(10) |
| N(3)-C(11)-C(19)  | 115.66(10) |
| N(3)-C(11)-N(2)   | 102.95(8)  |
| C(19)-C(11)-N(2)  | 109.73(9)  |
| C(23)-C(24)-C(19) | 118.27(11) |
| C(23)-C(24)-Pd(1) | 126.77(10) |
| C(19)-C(24)-Pd(1) | 114.81(8)  |
| N(2)-C(10)-C(9)   | 104.28(9)  |
| N(1)-C(5)-C(4)    | 121.78(11) |
| N(1)-C(5)-C(6)    | 116.08(10) |
| C(4)-C(5)-C(6)    | 122.12(11) |
| C(10)-C(9)-C(8)   | 101.88(10) |
| C(13)-C(18)-C(17) | 119.10(13) |
| C(14)-C(13)-C(18) | 120.84(13) |
| C(14)-C(13)-N(3)  | 118.56(12) |
| C(18)-C(13)-N(3)  | 120.60(11) |
| C(5)-C(4)-C(3)    | 119.11(12) |
| C(16)-C(17)-C(18) | 120.37(15) |
| N(1)-C(1)-C(2)    | 122.45(12) |
| C(21)-C(20)-C(19) | 119.68(13) |
| C(2)-C(3)-C(4)    | 118.99(13) |
| C(21)-C(22)-C(23) | 120.20(13) |
| C(22)-C(21)-C(20) | 119.99(13) |
| C(22)-C(23)-C(24) | 120.98(13) |
| C(13)-C(14)-C(15) | 119.46(15) |
| C(1)-C(2)-C(3)    | 118.93(13) |
| C(16)-C(15)-C(14) | 120.05(15) |
| C(15)-C(16)-C(17) | 120.12(15) |
| C(25)-O(2)-Pd(1)  | 119.17(8)  |
| O(3)-C(25)-O(2)   | 124.67(12) |
| O(3)-C(25)-C(26)  | 120.85(12) |
| O(2)-C(25)-C(26)  | 114.48(11) |

---

Symmetry transformations used to generate equivalent atoms:

Table 4. Anisotropic displacement parameters ( $\text{\AA}^2 \times 10^3$ ) for ef02. The anisotropic displacement factor exponent takes the form:  $-2\pi^2 [ h^2 a^{*2} U^{11} + \dots + 2 h k a^* b^* U^{12} ]$

|       | $U^{11}$ | $U^{22}$ | $U^{33}$ | $U^{23}$ | $U^{13}$ | $U^{12}$ |
|-------|----------|----------|----------|----------|----------|----------|
| Pd(1) | 13(1)    | 14(1)    | 12(1)    | -1(1)    | -1(1)    | 0(1)     |
| N(2)  | 14(1)    | 15(1)    | 12(1)    | 0(1)     | 0(1)     | 0(1)     |
| C(19) | 16(1)    | 19(1)    | 13(1)    | 1(1)     | 1(1)     | 3(1)     |
| N(1)  | 15(1)    | 15(1)    | 17(1)    | 0(1)     | -1(1)    | -1(1)    |
| C(7)  | 16(1)    | 16(1)    | 11(1)    | -1(1)    | 0(1)     | -2(1)    |
| C(6)  | 17(1)    | 16(1)    | 13(1)    | 0(1)     | 1(1)     | -2(1)    |
| N(3)  | 22(1)    | 14(1)    | 15(1)    | 0(1)     | 1(1)     | 0(1)     |
| C(8)  | 16(1)    | 24(1)    | 17(1)    | 2(1)     | -2(1)    | -4(1)    |
| C(12) | 19(1)    | 16(1)    | 15(1)    | 0(1)     | 2(1)     | -2(1)    |
| C(11) | 16(1)    | 16(1)    | 13(1)    | 1(1)     | 1(1)     | 0(1)     |
| C(24) | 15(1)    | 18(1)    | 14(1)    | -1(1)    | -1(1)    | 2(1)     |
| C(10) | 15(1)    | 24(1)    | 16(1)    | -1(1)    | 2(1)     | 2(1)     |
| C(5)  | 14(1)    | 16(1)    | 15(1)    | 1(1)     | 0(1)     | -2(1)    |
| C(9)  | 14(1)    | 30(1)    | 19(1)    | 5(1)     | 1(1)     | -3(1)    |
| C(18) | 32(1)    | 18(1)    | 19(1)    | 1(1)     | 1(1)     | -2(1)    |
| C(13) | 22(1)    | 14(1)    | 21(1)    | -1(1)    | -1(1)    | 0(1)     |
| C(4)  | 18(1)    | 19(1)    | 20(1)    | 2(1)     | -5(1)    | -2(1)    |
| C(17) | 49(1)    | 15(1)    | 22(1)    | 1(1)     | -6(1)    | -2(1)    |
| C(1)  | 21(1)    | 17(1)    | 24(1)    | -3(1)    | -5(1)    | 2(1)     |
| C(20) | 27(1)    | 22(1)    | 19(1)    | 4(1)     | -3(1)    | 2(1)     |
| C(3)  | 26(1)    | 21(1)    | 31(1)    | 3(1)     | -10(1)   | 3(1)     |
| C(22) | 21(1)    | 32(1)    | 22(1)    | 2(1)     | -7(1)    | 3(1)     |
| C(21) | 28(1)    | 28(1)    | 22(1)    | 7(1)     | -7(1)    | 3(1)     |
| C(23) | 19(1)    | 25(1)    | 21(1)    | 2(1)     | -5(1)    | 0(1)     |
| C(14) | 26(1)    | 19(1)    | 51(1)    | -2(1)    | 12(1)    | -1(1)    |
| C(2)  | 29(1)    | 17(1)    | 34(1)    | -2(1)    | -11(1)   | 5(1)     |
| C(15) | 31(1)    | 24(1)    | 67(1)    | -8(1)    | 10(1)    | 6(1)     |
| C(16) | 41(1)    | 16(1)    | 47(1)    | -2(1)    | -9(1)    | 5(1)     |
| O(1)  | 37(1)    | 20(1)    | 16(1)    | -4(1)    | 1(1)     | -1(1)    |
| O(2)  | 16(1)    | 18(1)    | 17(1)    | -4(1)    | 1(1)     | -1(1)    |
| C(25) | 19(1)    | 19(1)    | 17(1)    | -3(1)    | 2(1)     | -2(1)    |



|       |       |       |       |        |      |        |
|-------|-------|-------|-------|--------|------|--------|
| O(3)  | 24(1) | 41(1) | 35(1) | -20(1) | 9(1) | -3(1)  |
| C(26) | 28(1) | 32(1) | 26(1) | -10(1) | 4(1) | -12(1) |

---

Table 5. Hydrogen coordinates ( $\times 10^4$ ) and isotropic displacement parameters ( $\text{\AA}^2 \times 10^3$ ) for ef02.

|        | x     | y     | z     | U(eq) |
|--------|-------|-------|-------|-------|
| H(6A)  | 10070 | 8453  | 10723 | 19    |
| H(6B)  | 8935  | 8359  | 10166 | 19    |
| H(8A)  | 12255 | 9492  | 10023 | 23    |
| H(8B)  | 12209 | 8289  | 9943  | 23    |
| H(11A) | 10547 | 10095 | 8219  | 18    |
| H(10A) | 11430 | 8605  | 7941  | 22    |
| H(10B) | 11519 | 7699  | 8530  | 22    |
| H(9A)  | 12459 | 9725  | 8746  | 25    |
| H(9B)  | 13230 | 8700  | 8849  | 25    |
| H(18A) | 10447 | 11970 | 8376  | 27    |
| H(4A)  | 11043 | 6878  | 11086 | 23    |
| H(17A) | 9700  | 13639 | 8290  | 34    |
| H(1A)  | 9614  | 5419  | 8893  | 25    |
| H(20A) | 8894  | 11026 | 7402  | 27    |
| H(3A)  | 11371 | 5135  | 10876 | 31    |
| H(22A) | 6264  | 9172  | 6522  | 30    |
| H(21A) | 7298  | 10733 | 6535  | 31    |
| H(23A) | 6791  | 7912  | 7384  | 26    |
| H(14A) | 7645  | 11286 | 9807  | 38    |
| H(2A)  | 10609 | 4400  | 9769  | 32    |
| H(15A) | 6870  | 12943 | 9684  | 49    |
| H(16A) | 7890  | 14107 | 8918  | 42    |
| H(26A) | 6367  | 4893  | 7497  | 43    |
| H(26B) | 5589  | 5881  | 7679  | 43    |
| H(26C) | 5937  | 5115  | 8328  | 43    |

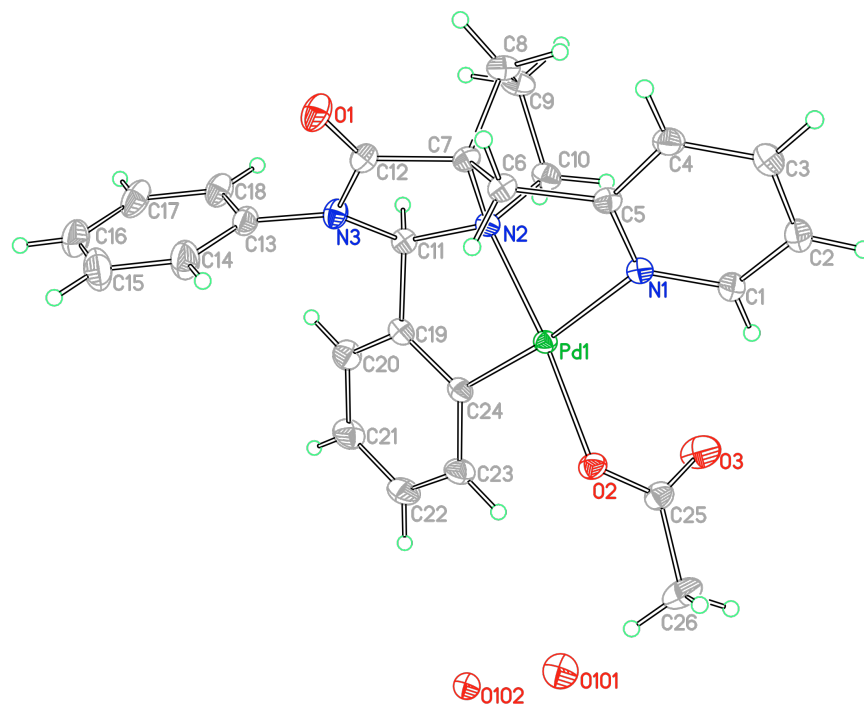

(Collected data to 0.75 Å, but truncated at 1 Å due to weak scattering.)

Table 6. Crystal data and structure refinement for **26**.

|                                   |                                                               |                       |
|-----------------------------------|---------------------------------------------------------------|-----------------------|
| Identification code               | ef05                                                          |                       |
| Empirical formula                 | C <sub>28</sub> H <sub>28</sub> N <sub>4</sub> O <sub>5</sub> |                       |
| Formula weight                    | 500.54                                                        |                       |
| Temperature                       | 120 K                                                         |                       |
| Wavelength                        | 0.71073 Å                                                     |                       |
| Crystal system                    | Orthorhombic                                                  |                       |
| Space group                       | <i>P</i> 2 <sub>1</sub> 2 <sub>1</sub> 2 <sub>1</sub>         |                       |
| Unit cell dimensions              | <i>a</i> = 8.5307(4) Å                                        | $\alpha = 90^\circ$ . |
|                                   | <i>b</i> = 9.5523(5) Å                                        | $\beta = 90^\circ$ .  |
|                                   | <i>c</i> = 30.0128(13) Å                                      | $\gamma = 90^\circ$ . |
| Volume                            | 2445.7(2) Å <sup>3</sup>                                      |                       |
| Z                                 | 4                                                             |                       |
| Density (calculated)              | 1.359 Mg/m <sup>3</sup>                                       |                       |
| Absorption coefficient            | 0.095 mm <sup>-1</sup>                                        |                       |
| F(000)                            | 1056                                                          |                       |
| Crystal size                      | 0.383 x 0.10 x 0.065 mm <sup>3</sup>                          |                       |
| Theta range for data collection   | 2.24 to 20.82°.                                               |                       |
| Index ranges                      | -8 ≤ <i>h</i> ≤ 8, -9 ≤ <i>k</i> ≤ 9, -30 ≤ <i>l</i> ≤ 28     |                       |
| Reflections collected             | 22831                                                         |                       |
| Independent reflections           | 2574 [R(int) = 0.0767]                                        |                       |
| Completeness to theta = 20.82°    | 99.8 %                                                        |                       |
| Absorption correction             | Semi-empirical from equivalents                               |                       |
| Max. and min. transmission        | 0.7454 and 0.6607                                             |                       |
| Refinement method                 | Full-matrix least-squares on F <sup>2</sup>                   |                       |
| Data / restraints / parameters    | 2574 / 0 / 335                                                |                       |
| Goodness-of-fit on F <sup>2</sup> | 1.183                                                         |                       |
| Final R indices [I > 2σ(I)]       | R1 = 0.0402, wR2 = 0.1084                                     |                       |
| R indices (all data)              | R1 = 0.0562, wR2 = 0.1404                                     |                       |
| Absolute structure parameter      | 1(2)                                                          |                       |
| Largest diff. peak and hole       | 0.404 and -0.456 e.Å <sup>-3</sup>                            |                       |

Table 7. Atomic coordinates ( $\times 10^4$ ) and equivalent isotropic displacement parameters ( $\text{\AA}^2 \times 10^3$ ) for ef05.  $U(\text{eq})$  is defined as one third of the trace of the orthogonalized  $U^{ij}$  tensor.

|       | x       | y        | z       | $U(\text{eq})$ |
|-------|---------|----------|---------|----------------|
| C(1)  | 3299(6) | 1011(5)  | 3592(2) | 22(1)          |
| C(2)  | 2788(6) | 2290(6)  | 3451(2) | 29(2)          |
| C(3)  | 3829(7) | 24(6)    | 3303(2) | 31(2)          |
| C(4)  | 2870(6) | 2603(6)  | 2999(2) | 29(2)          |
| C(5)  | 3898(7) | 326(5)   | 2858(2) | 26(1)          |
| C(6)  | 3425(6) | 1623(6)  | 2704(2) | 21(1)          |
| C(7)  | 3578(7) | 2035(6)  | 2227(2) | 24(1)          |
| C(8)  | 4559(7) | 1308(6)  | 1517(2) | 27(1)          |
| C(9)  | 4198(6) | 88(6)    | 1213(2) | 20(1)          |
| C(10) | 5283(6) | 141(6)   | 807(2)  | 33(2)          |
| C(11) | 2507(6) | 35(6)    | 1043(2) | 16(1)          |
| C(12) | 1390(6) | -1218(5) | 1719(2) | 18(1)          |
| C(13) | 985(6)  | -952(5)  | 2158(2) | 23(1)          |
| C(14) | 1927(7) | -2540(5) | 1597(2) | 25(1)          |
| C(15) | 1156(7) | -2005(6) | 2474(2) | 31(2)          |
| C(16) | 2101(7) | -3562(6) | 1911(2) | 32(2)          |
| C(17) | 1729(6) | -3311(6) | 2345(2) | 30(2)          |
| C(18) | 90(6)   | 811(5)   | 1351(2) | 18(1)          |
| C(19) | 523(6)  | 1838(5)  | 984(2)  | 16(1)          |
| C(20) | -643(6) | 1839(6)  | 591(2)  | 22(1)          |
| C(21) | 433(7)  | 1977(6)  | 182(2)  | 31(2)          |
| C(22) | 1830(6) | 1097(5)  | 313(2)  | 22(1)          |
| C(23) | 664(6)  | 3306(5)  | 1203(2) | 18(1)          |
| C(24) | 1143(6) | 4460(5)  | 890(2)  | 18(1)          |
| C(25) | 2673(6) | 4635(6)  | 749(2)  | 23(1)          |
| C(26) | 3030(7) | 5670(5)  | 449(2)  | 26(1)          |
| C(27) | 1843(7) | 6531(6)  | 299(2)  | 25(1)          |
| C(28) | 383(7)  | 6317(6)  | 463(2)  | 29(1)          |
| N(1)  | 3346(5) | 714(6)   | 4069(2) | 27(1)          |
| N(2)  | 1317(5) | -111(4)  | 1398(1) | 17(1)          |
| N(3)  | 2020(5) | 1311(4)  | 800(1)  | 18(1)          |

|      |          |         |         |       |
|------|----------|---------|---------|-------|
| N(4) | -17(5)   | 5314(5) | 751(1)  | 27(1) |
| O(1) | 3222(5)  | 1696(4) | 4332(1) | 35(1) |
| O(2) | 3580(4)  | -500(5) | 4188(1) | 31(1) |
| O(3) | 3270(5)  | 3183(4) | 2086(1) | 38(1) |
| O(4) | 4112(4)  | 991(4)  | 1973(1) | 27(1) |
| O(5) | -1121(4) | 801(3)  | 1567(1) | 25(1) |

---

Table 8. Bond lengths [Å] and angles [°] for e005.

---

|             |          |
|-------------|----------|
| C(1)-C(3)   | 1.358(7) |
| C(1)-C(2)   | 1.365(7) |
| C(1)-N(1)   | 1.460(7) |
| C(2)-C(4)   | 1.388(8) |
| C(3)-C(5)   | 1.368(7) |
| C(4)-C(6)   | 1.373(7) |
| C(5)-C(6)   | 1.383(7) |
| C(6)-C(7)   | 1.491(7) |
| C(7)-O(3)   | 1.205(6) |
| C(7)-O(4)   | 1.336(6) |
| C(8)-O(4)   | 1.453(6) |
| C(8)-C(9)   | 1.512(7) |
| C(9)-C(10)  | 1.530(7) |
| C(9)-C(11)  | 1.530(7) |
| C(11)-N(2)  | 1.477(6) |
| C(11)-N(3)  | 1.481(6) |
| C(12)-C(13) | 1.387(7) |
| C(12)-C(14) | 1.392(7) |
| C(12)-N(2)  | 1.432(6) |
| C(13)-C(15) | 1.390(7) |
| C(14)-C(16) | 1.366(7) |
| C(15)-C(17) | 1.394(8) |
| C(16)-C(17) | 1.362(8) |
| C(18)-O(5)  | 1.220(6) |
| C(18)-N(2)  | 1.375(6) |
| C(18)-C(19) | 1.522(7) |
| C(19)-N(3)  | 1.480(6) |
| C(19)-C(20) | 1.544(7) |
| C(19)-C(23) | 1.554(7) |
| C(20)-C(21) | 1.538(7) |
| C(21)-C(22) | 1.510(7) |
| C(22)-N(3)  | 1.484(6) |
| C(23)-C(24) | 1.505(7) |
| C(24)-N(4)  | 1.349(6) |

|             |          |
|-------------|----------|
| C(24)-C(25) | 1.382(7) |
| C(25)-C(26) | 1.371(7) |
| C(26)-C(27) | 1.380(7) |
| C(27)-C(28) | 1.354(8) |
| C(28)-N(4)  | 1.335(6) |
| N(1)-O(2)   | 1.230(5) |
| N(1)-O(1)   | 1.230(5) |

|                   |          |
|-------------------|----------|
| C(3)-C(1)-C(2)    | 122.0(5) |
| C(3)-C(1)-N(1)    | 118.8(5) |
| C(2)-C(1)-N(1)    | 119.1(5) |
| C(1)-C(2)-C(4)    | 118.6(5) |
| C(1)-C(3)-C(5)    | 119.4(5) |
| C(6)-C(4)-C(2)    | 120.0(5) |
| C(3)-C(5)-C(6)    | 120.1(5) |
| C(4)-C(6)-C(5)    | 119.8(5) |
| C(4)-C(6)-C(7)    | 118.0(5) |
| C(5)-C(6)-C(7)    | 122.1(5) |
| O(3)-C(7)-O(4)    | 123.6(5) |
| O(3)-C(7)-C(6)    | 124.0(5) |
| O(4)-C(7)-C(6)    | 112.4(5) |
| O(4)-C(8)-C(9)    | 110.8(4) |
| C(8)-C(9)-C(10)   | 109.4(4) |
| C(8)-C(9)-C(11)   | 114.7(4) |
| C(10)-C(9)-C(11)  | 107.9(4) |
| N(2)-C(11)-N(3)   | 103.9(4) |
| N(2)-C(11)-C(9)   | 114.3(4) |
| N(3)-C(11)-C(9)   | 113.7(4) |
| C(13)-C(12)-C(14) | 119.8(4) |
| C(13)-C(12)-N(2)  | 119.6(5) |
| C(14)-C(12)-N(2)  | 120.5(4) |
| C(12)-C(13)-C(15) | 119.3(5) |
| C(16)-C(14)-C(12) | 120.2(5) |
| C(13)-C(15)-C(17) | 119.7(5) |
| C(17)-C(16)-C(14) | 120.6(6) |
| C(16)-C(17)-C(15) | 120.2(5) |



|                   |          |
|-------------------|----------|
| O(5)-C(18)-N(2)   | 125.9(4) |
| O(5)-C(18)-C(19)  | 126.6(5) |
| N(2)-C(18)-C(19)  | 107.5(4) |
| N(3)-C(19)-C(18)  | 105.1(4) |
| N(3)-C(19)-C(20)  | 105.7(4) |
| C(18)-C(19)-C(20) | 113.4(4) |
| N(3)-C(19)-C(23)  | 113.5(4) |
| C(18)-C(19)-C(23) | 107.1(4) |
| C(20)-C(19)-C(23) | 111.9(4) |
| C(21)-C(20)-C(19) | 103.0(4) |
| C(22)-C(21)-C(20) | 102.5(4) |
| N(3)-C(22)-C(21)  | 105.4(4) |
| C(24)-C(23)-C(19) | 114.7(4) |
| N(4)-C(24)-C(25)  | 121.7(5) |
| N(4)-C(24)-C(23)  | 115.9(4) |
| C(25)-C(24)-C(23) | 122.4(5) |
| C(26)-C(25)-C(24) | 119.8(5) |
| C(25)-C(26)-C(27) | 118.8(5) |
| C(28)-C(27)-C(26) | 117.8(5) |
| N(4)-C(28)-C(27)  | 125.3(5) |
| O(2)-N(1)-O(1)    | 123.2(4) |
| O(2)-N(1)-C(1)    | 118.2(5) |
| O(1)-N(1)-C(1)    | 118.6(5) |
| C(18)-N(2)-C(12)  | 125.0(4) |
| C(18)-N(2)-C(11)  | 113.0(4) |
| C(12)-N(2)-C(11)  | 121.6(4) |
| C(19)-N(3)-C(11)  | 109.8(4) |
| C(19)-N(3)-C(22)  | 108.7(4) |
| C(11)-N(3)-C(22)  | 113.8(4) |
| C(28)-N(4)-C(24)  | 116.6(4) |
| C(7)-O(4)-C(8)    | 118.1(4) |

---

Symmetry transformations used to generate equivalent atoms:

Table 9. Anisotropic displacement parameters ( $\text{\AA}^2 \times 10^3$ ) for ef05. The anisotropic displacement factor exponent takes the form:  $-2\pi^2 [ h^2 a^{*2} U^{11} + \dots + 2 h k a^* b^* U^{12} ]$

|       | U <sup>11</sup> | U <sup>22</sup> | U <sup>33</sup> | U <sup>23</sup> | U <sup>13</sup> | U <sup>12</sup> |
|-------|-----------------|-----------------|-----------------|-----------------|-----------------|-----------------|
| C(1)  | 16(3)           | 27(4)           | 24(3)           | 0(3)            | 0(3)            | -1(3)           |
| C(2)  | 25(4)           | 28(4)           | 34(4)           | -12(3)          | -4(3)           | 3(3)            |
| C(3)  | 42(4)           | 23(3)           | 27(4)           | 1(3)            | -3(3)           | 6(3)            |
| C(4)  | 26(4)           | 24(3)           | 37(4)           | 0(3)            | -11(3)          | 5(3)            |
| C(5)  | 39(4)           | 16(3)           | 23(3)           | 0(2)            | -4(3)           | 7(3)            |
| C(6)  | 15(3)           | 26(3)           | 23(3)           | -6(3)           | -11(2)          | 2(3)            |
| C(7)  | 22(4)           | 18(4)           | 33(4)           | -4(3)           | -6(3)           | -4(3)           |
| C(8)  | 18(3)           | 35(3)           | 28(3)           | 11(3)           | -1(3)           | -4(3)           |
| C(9)  | 17(3)           | 24(3)           | 21(3)           | 4(2)            | 5(2)            | 2(3)            |
| C(10) | 19(3)           | 47(4)           | 34(3)           | 10(3)           | 5(3)            | 12(3)           |
| C(11) | 20(3)           | 11(3)           | 17(3)           | 3(2)            | 9(2)            | 0(2)            |
| C(12) | 14(3)           | 17(3)           | 23(3)           | 7(2)            | -3(2)           | -6(3)           |
| C(13) | 20(3)           | 26(3)           | 23(3)           | -1(3)           | 7(2)            | 2(3)            |
| C(14) | 35(4)           | 16(3)           | 22(3)           | 2(3)            | 1(3)            | -5(3)           |
| C(15) | 32(4)           | 43(4)           | 18(3)           | 10(3)           | 0(3)            | -14(3)          |
| C(16) | 43(4)           | 21(4)           | 33(4)           | 10(3)           | -7(3)           | -1(3)           |
| C(17) | 25(4)           | 28(4)           | 37(4)           | 19(3)           | -6(3)           | -4(3)           |
| C(18) | 20(3)           | 16(3)           | 17(3)           | 0(2)            | -1(3)           | -8(3)           |
| C(19) | 13(3)           | 18(3)           | 15(3)           | 0(2)            | -1(2)           | 1(3)            |
| C(20) | 25(4)           | 20(3)           | 22(3)           | 4(2)            | -2(3)           | -3(3)           |
| C(21) | 34(4)           | 35(4)           | 23(3)           | -2(3)           | -6(3)           | 1(3)            |
| C(22) | 28(3)           | 25(3)           | 14(3)           | 5(2)            | 1(2)            | -4(3)           |
| C(23) | 17(3)           | 21(3)           | 17(3)           | 1(2)            | 3(2)            | 5(3)            |
| C(24) | 21(3)           | 11(3)           | 22(3)           | -3(2)           | -2(3)           | 2(3)            |
| C(25) | 23(4)           | 22(3)           | 23(3)           | 1(3)            | -1(3)           | 1(3)            |
| C(26) | 25(3)           | 24(3)           | 30(3)           | -1(3)           | 5(3)            | -1(3)           |
| C(27) | 32(4)           | 24(3)           | 20(3)           | 6(3)            | 3(3)            | -5(3)           |
| C(28) | 31(4)           | 26(3)           | 31(3)           | 11(3)           | -4(3)           | 1(3)            |
| N(1)  | 21(3)           | 33(3)           | 29(3)           | -2(3)           | 2(2)            | -4(3)           |
| N(2)  | 16(3)           | 17(2)           | 18(2)           | 5(2)            | -1(2)           | 1(2)            |
| N(3)  | 15(3)           | 23(3)           | 17(2)           | 5(2)            | 4(2)            | 3(2)            |

|      |       |       |       |        |       |       |
|------|-------|-------|-------|--------|-------|-------|
| N(4) | 26(3) | 23(3) | 31(3) | 6(2)   | 2(2)  | 2(3)  |
| O(1) | 37(3) | 39(3) | 28(2) | -13(2) | -1(2) | -6(2) |
| O(2) | 31(2) | 36(3) | 27(2) | 3(2)   | -2(2) | 0(2)  |
| O(3) | 56(3) | 21(2) | 37(2) | 7(2)   | -4(2) | 7(2)  |
| O(4) | 33(3) | 26(2) | 22(2) | 7(2)   | -2(2) | 1(2)  |
| O(5) | 21(2) | 25(2) | 27(2) | 8(2)   | 7(2)  | 1(2)  |

---

Table 10. Hydrogen coordinates ( $\times 10^4$ ) and isotropic displacement parameters ( $\text{\AA}^2 \times 10^3$ ) for ef05.

|        | x     | y     | z    | U(eq) |
|--------|-------|-------|------|-------|
| H(2)   | 2393  | 2939  | 3652 | 35    |
| H(3)   | 4142  | -850  | 3407 | 37    |
| H(4)   | 2548  | 3476  | 2897 | 35    |
| H(5)   | 4263  | -343  | 2658 | 31    |
| H(8A)  | 5671  | 1515  | 1505 | 32    |
| H(8B)  | 3994  | 2130  | 1416 | 32    |
| H(9)   | 4412  | -780  | 1376 | 24    |
| H(10A) | 5170  | 1028  | 660  | 50    |
| H(10B) | 5011  | -598  | 605  | 50    |
| H(10C) | 6350  | 25    | 902  | 50    |
| H(11)  | 2409  | -766  | 841  | 19    |
| H(13)  | 603   | -78   | 2241 | 28    |
| H(14)  | 2168  | -2727 | 1301 | 30    |
| H(15)  | 890   | -1840 | 2770 | 37    |
| H(16)  | 2478  | -4437 | 1828 | 39    |
| H(17)  | 1857  | -4014 | 2557 | 36    |
| H(20A) | -1240 | 975   | 581  | 27    |
| H(20B) | -1363 | 2623  | 611  | 27    |
| H(21A) | -68   | 1613  | -84  | 37    |
| H(21B) | 732   | 2944  | 132  | 37    |
| H(22A) | 1642  | 118   | 246  | 27    |
| H(22B) | 2761  | 1400  | 154  | 27    |
| H(23A) | -339  | 3548  | 1334 | 22    |
| H(23B) | 1426  | 3254  | 1442 | 22    |
| H(25)  | 3458  | 4051  | 857  | 27    |
| H(26)  | 4053  | 5790  | 349  | 32    |
| H(27)  | 2039  | 7235  | 92   | 31    |
| H(28)  | -405  | 6918  | 366  | 35    |

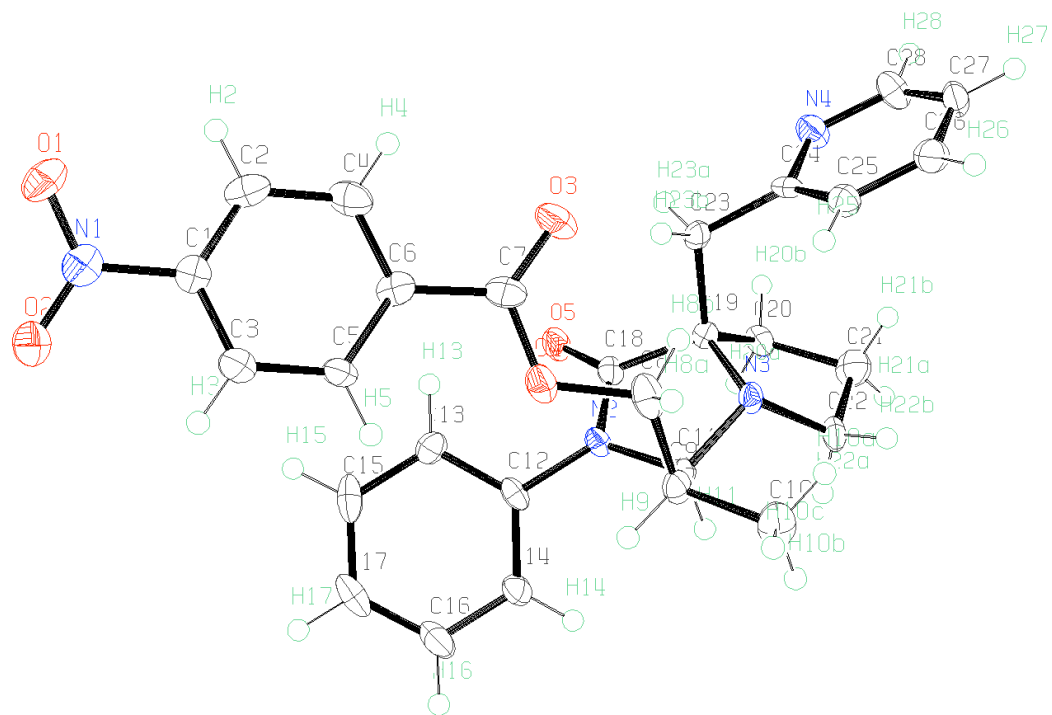

Supplement: c2sc20176c_3.pdf [file c2sc20176c_3.pdf]
